# Supplementary material
Source: MDPI journal article supplement (https://www.mdpi.com/2073-4441/13/21/3089)
Supplement: s1 [file s1]

**Table S1.** Environmental factors in BP (large areas) and SP (small areas) ponds during a culture period (Mean  $\pm$  SD)

| Index                            |    | May              | June             | July             | Aug.             | Sept.            | Oct.             |
|----------------------------------|----|------------------|------------------|------------------|------------------|------------------|------------------|
| T                                | BP | 23.90 $\pm$ 0.07 | 28.90 $\pm$ 0.3  | 27.67 $\pm$ 0.12 | 28.80 $\pm$ 0.26 | 25.17 $\pm$ 0.32 | 20.03 $\pm$ 0.12 |
|                                  | SP | 24.00 $\pm$ 0.35 | 28.63 $\pm$ 0.12 | 27.50 $\pm$ 0.30 | 28.93 $\pm$ 0.15 | 25.43 $\pm$ 0.12 | 20.33 $\pm$ 0.12 |
| DO                               | BP | 4.05 $\pm$ 0.52  | 4.36 $\pm$ 0.14  | 1.87 $\pm$ 0.57  | 6.36 $\pm$ 1.90  | 9.85 $\pm$ 2.47  | 2.71 $\pm$ 1.16  |
|                                  | SP | 4.07 $\pm$ 3.16  | 3.43 $\pm$ 1.65  | 2.14 $\pm$ 1.19  | 5.48 $\pm$ 3.28  | 8.88 $\pm$ 1.09  | 2.27 $\pm$ 0.63  |
| pH                               | BP | 7.65 $\pm$ 0.08  | 7.25 $\pm$ 0.61  | 7.56 $\pm$ 0.01  | 7.87 $\pm$ 0.24  | 8.35 $\pm$ 0.15  | 7.85 $\pm$ 0.11  |
|                                  | SP | 7.61 $\pm$ 0.18  | 7.41 $\pm$ 0.20  | 7.57 $\pm$ 0.01  | 7.81 $\pm$ 0.24  | 8.03 $\pm$ 0.18  | 7.71 $\pm$ 0.09  |
| SD                               | BP | 29.00 $\pm$ 5.29 | 32.33 $\pm$ 2.89 | 34.67 $\pm$ 4.04 | 28.00 $\pm$ 6.24 | 27.63 $\pm$ 1.15 | 30.00 $\pm$ 0.00 |
|                                  | SP | 28.67 $\pm$ 7.77 | 33.67 $\pm$ 4.51 | 23.00 $\pm$ 3.61 | 27.67 $\pm$ 1.15 | 27.33 $\pm$ 3.75 | 29.00 $\pm$ 1.00 |
| PO <sub>4</sub> <sup>3-</sup> -P | BP | 0.83 $\pm$ 0.01  | 0.78 $\pm$ 0.52  | 0.69 $\pm$ 0.47  | 1.08 $\pm$ 0.67  | 1.02 $\pm$ 0.84  | 1.04 $\pm$ 0.38  |
|                                  | SP | 0.62 $\pm$ 0.34  | 0.38 $\pm$ 0.26  | 0.40 $\pm$ 0.37  | 0.60 $\pm$ 0.37  | 0.39 $\pm$ 0.46  | 0.57 $\pm$ 0.42  |
| TP                               | BP | 2.33 $\pm$ 0.11  | 2.32 $\pm$ 0.97  | 2.16 $\pm$ 0.57  | 2.64 $\pm$ 0.91  | 2.45 $\pm$ 1.49  | 2.43 $\pm$ 0.62  |
|                                  | SP | 2.17 $\pm$ 0.32  | 1.60 $\pm$ 0.53  | 1.35 $\pm$ 0.65  | 1.77 $\pm$ 1.05  | 1.37 $\pm$ 0.76  | 1.59 $\pm$ 0.85  |
| TN                               | BP | 3.83 $\pm$ 2.27  | 2.13 $\pm$ 0.84  | 4.37 $\pm$ 0.21  | 3.07 $\pm$ 0.95  | 1.73 $\pm$ 0.06  | 3.67 $\pm$ 1.60  |
|                                  | SP | 2.93 $\pm$ 0.93  | 2.40 $\pm$ 1.30  | 5.30 $\pm$ 1.51  | 3.70 $\pm$ 0.44  | 2.60 $\pm$ 0.46  | 7.70 $\pm$ 4.81  |
| NH <sub>4</sub> <sup>+</sup> -N  | BP | 0.39 $\pm$ 0.12  | 0.35 $\pm$ 0.52  | 0.45 $\pm$ 0.25  | 0.23 $\pm$ 0.09  | 0.45 $\pm$ 0.28  | 0.77 $\pm$ 1.09  |
|                                  | SP | 0.32 $\pm$ 0.34  | 0.77 $\pm$ 0.79  | 1.14 $\pm$ 0.39  | 0.73 $\pm$ 0.87  | 1.77 $\pm$ 0.63  | 1.75 $\pm$ 1.58  |
| NO <sub>3</sub> <sup>-</sup> -N  | BP | 0.27 $\pm$ 0.29  | 0.20 $\pm$ 0.10  | 0.80 $\pm$ 0.78  | 0.57 $\pm$ 0.06  | 0.87 $\pm$ 0.06  | 1.00 $\pm$ 0.10  |
|                                  | SP | 0.37 $\pm$ 0.25  | 0.67 $\pm$ 0.15  | 0.90 $\pm$ 0.66  | 0.73 $\pm$ 0.38  | 0.90 $\pm$ 0.26  | 1.13 $\pm$ 0.75  |
| NO <sub>2</sub> <sup>-</sup> -N  | BP | 0.06 $\pm$ 0.02  | 0.07 $\pm$ 0.03  | 0.09 $\pm$ 0.08  | 0.05 $\pm$ 0.02  | 0.15 $\pm$ 0.11  | 0.09 $\pm$ 0.07  |
|                                  | SP | 0.16 $\pm$ 0.15  | 0.09 $\pm$ 0.01  | 0.07 $\pm$ 0.04  | 0.20 $\pm$ 0.10  | 0.21 $\pm$ 0.14  | 0.04 $\pm$ 0.04  |
